# Supplementary material for: Strategies from A Multi-National Sample of Electroconvulsive Therapy (ECT) Services: Managing Anesthesia for ECT during the COVID-19 Pandemic
Source: MDPI journal article supplement (doi:10.3390/psychiatryint3040026), 2022-11-03
Supplement: s1 [file s1]

Archive with 1 entries (1 files):
- psychiatryint-1913398-supplementary.pdf
